# Supplementary material for: Surgical outcomes and survival for T4 gastric cancer extending to the transverse colon
Source: PubMed Central journal article supplement — Ann Transl Med. 2020 Aug;8(15):947. doi: 10.21037/atm-20-3377 (PMC7475396; doi:10.21037/atm-20-3377), 2020-08
Supplement: atm-08-15-947-dss.pdf [file atm-08-15-947-dss.pdf]

## Data Sharing Statement

|                     |                                                                                                                                                    |                                                           |
|---------------------|----------------------------------------------------------------------------------------------------------------------------------------------------|-----------------------------------------------------------|
| <b>Article Info</b> | <a href="http://dx.doi.org/10.21037/atm-20-3377">http://dx.doi.org/10.21037/atm-20-3377</a>                                                        |                                                           |
| <b>Item</b>         | <b>Question</b>                                                                                                                                    | <b>Authors' Response</b><br>(place "-" if not applicable) |
| 1                   | Would you like to share data collected for your study to others?                                                                                   | Yes.                                                      |
| 2                   | If not, would you like to share the reason for your decision?                                                                                      | -                                                         |
| 3                   | What data in particular will be shared?                                                                                                            | All.                                                      |
| 4                   | Any other documents will be share? Such as study protocol, statistical analysis plan, informed consent form, clinical study report, analytic code. | Yes.                                                      |
| 5                   | When will data availability begin?                                                                                                                 | Since the article is online.                              |
| 6                   | When will data availability end?                                                                                                                   | Within six months.                                        |
| 7                   | To whom will you share the data?                                                                                                                   | Researchers.                                              |
| 8                   | For what type of analysis or purpose?                                                                                                              | Study.                                                    |
| 9                   | How or where can the data/documents be obtained?                                                                                                   | Contact by email.                                         |
| 10                  | Any other restrictions?                                                                                                                            | No.                                                       |
